# Supplementary material for: Patterns and predictors of public dental service utilisation among refugees in Victoria, Australia: a latent profile and multilevel analysis
Source: Springer Nature journal article supplement (doi:10.1186/s12903-023-02886-3), 2023-04-04
Supplement: MOESM2 [file 25207648]

## Supplementary Results

**Table S4.** Statistical fit indices for the estimated latent profile models

| Model | No. of profile groups | Log likelihood | df  | AIC      | BIC      | $\Delta$ BIC | Entropy | Size of the smallest profile |
|-------|-----------------------|----------------|-----|----------|----------|--------------|---------|------------------------------|
| 1     | 1                     | -552503.3      | 22  | 1105051  | 1105230  |              |         |                              |
| 2     | 2                     | -527160.7      | 45  | 1054411  | 1054778  | 50452        | 0.77    | 42.28%                       |
| 3     | 3                     | -515083.3      | 68  | 1030303  | 1030857  | 23921        | 0.79    | 17.22%                       |
| 4     | 4                     | -508773.4      | 91  | 1017729  | 1018470  | 12387        | 0.82    | 8.06%                        |
| 5     | 5                     | -502599.3      | 114 | 1005427  | 1006356  | 12114        | 0.82    | 7.73%                        |
| 6     | 6                     | -499792.8      | 137 | 999859.6 | 1000976  | 5380         | 0.86    | 6.68%                        |
| 7     | 7                     | -496547.4      | 160 | 993414.8 | 994718.5 | 6257.5       | 0.83    | 4.54%                        |
| 8     | 8                     | -493536.0      | 183 | 987438   | 988929.1 | 5789.4       | 0.77    | 4.39%                        |
| 9     | 9                     | -489189.8      | 206 | 978791.5 | 980470   | 8459.1       | 0.82    | 3.58%                        |
| 10    | 10                    | -487096.9      | 229 | 974651.8 | 976517.7 | 3952.3       | 0.80    | 1.12%                        |

Note: AIC, Akaike information criterion; BIC, Bayesian information criterion;  $\Delta$ BIC, difference in Bayesian information criteria values

**Table S5.** Parameters of classification accuracy for each profile group in the selected six-profile model

| Predicted profile assignment | Avg. group post probability | Odds of correct classification |
|------------------------------|-----------------------------|--------------------------------|
| 1                            | 0.85                        | 10.60                          |
| 2                            | 0.92                        | 71.75                          |
| 3                            | 0.88                        | 76.85                          |
| 4                            | 0.96                        | 13.18                          |
| 5                            | 0.82                        | 37.33                          |
| 6                            | 0.91                        | 34.38                          |

**Table S6.** Predicted marginal means of the indicator variables in each utilisation profile with 95% confidence intervals

| <b>Indicators</b>               | <b>Profile 1<br/>Mean [95% CI]</b> | <b>Profile 2<br/>Mean [95% CI]</b> | <b>Profile 3<br/>Mean [95% CI]</b> | <b>Profile 4<br/>Mean [95% CI]</b> | <b>Profile 5<br/>Mean [95% CI]</b> | <b>Profile 6<br/>Mean [95% CI]</b> |
|---------------------------------|------------------------------------|------------------------------------|------------------------------------|------------------------------------|------------------------------------|------------------------------------|
| <b>Type of course of care</b>   |                                    |                                    |                                    |                                    |                                    |                                    |
| General                         | 1.109<br>[1.085, 1.133]            | 0.956<br>[0.910, 1.001]            | 1.300<br>[1.254, 1.347]            | 1.556<br>[1.520, 1.593]            | 1.320<br>[1.273, 1.367]            | 0.592<br>[0.569, 0.615]            |
| Emergency                       | 0.490<br>[0.471, 0.509]            | 0.675<br>[0.636, 0.713]            | 1.563<br>[1.508, 1.619]            | 0.177<br>[0.164, 0.191]            | 0.278<br>[0.246, 0.311]            | 1.165<br>[1.136, 1.195]            |
| Denture                         | 0.004<br>[0.003, 0.006]            | 1.040<br>[0.989, 1.092]            | 0.039<br>[0.031, 0.047]            | 0.007<br>[0.001, 0.016]            | 0.018<br>[0.012, 0.024]            | 0.014<br>[0.011, 0.018]            |
| <b>Major service areas</b>      |                                    |                                    |                                    |                                    |                                    |                                    |
| Consultations                   | 0.226<br>[0.213, 0.239]            | 0.759<br>[0.716, 0.803]            | 0.656<br>[0.620, 0.693]            | 0.106<br>[0.095, 0.116]            | 0.359<br>[0.324, 0.393]            | 0.184<br>[0.171, 0.196]            |
| Oral and radiographic exam      | 2.874<br>[2.832, 2.916]            | 3.514<br>[3.420, 3.608]            | 5.170<br>[5.059, 5.281]            | 1.350<br>[1.311, 1.389]            | 3.362<br>[3.265, 3.458]            | 3.194<br>[3.142, 3.246]            |
| Prophylactic and preventive     | 1.061<br>[1.030, 1.093]            | 1.056<br>[1.004, 1.108]            | 1.721<br>[1.660, 1.783]            | 0.585<br>[0.561, 0.609]            | 2.863<br>[2.766, 2.960]            | 1.198<br>[1.165, 1.231]            |
| Periodontic                     | 0.094<br>[0.084, 0.105]            | 0.285<br>[0.257, 0.313]            | 0.443<br>[0.412, 0.475]            | 0.005<br>[0.003, 0.007]            | 1.350<br>[1.270, 1.428]            | 0.136<br>[0.124, 0.149]            |
| Extractions                     | 0.382<br>[0.368, 0.398]            | 1.277<br>[1.221, 1.332]            | 0.653<br>[0.616, 0.689]            | 0.147<br>[0.135, 0.160]            | 0.347<br>[0.316, 0.377]            | 1.428<br>[1.409, 1.447]            |
| Minor, major, and other surgery | 0.008<br>[0.006, 0.010]            | 0.028<br>[0.020, 0.036]            | 0.024<br>[0.018, 0.031]            | 0.011<br>[0.008, 0.020]            | 0.007<br>[0.003, 0.011]            | 0.004<br>[0.002, 0.006]            |
| Endodontic                      | 0.082<br>[0.074, 0.091]            | 0.062<br>[0.049, 0.076]            | 1.293<br>[1.240, 1.346]            | 0.018<br>[0.014, 0.022]            | 0.017<br>[0.010, 0.025]            | 0.124<br>[0.112, 0.135]            |
| Restorative                     | 1.330<br>[1.295, 1.365]            | 1.172<br>[1.114, 1.230]            | 3.672<br>[3.584, 3.761]            | 0.498<br>[0.475, 0.522]            | 1.302<br>[1.228, 1.377]            | 0.507<br>[0.469, 0.545]            |
| Crown, bridge, and implants     | 0.023<br>[0.019, 0.027]            | 0.078<br>[0.064, 0.092]            | 0.107<br>[0.093, 0.121]            | 0.010<br>[0.002, 0.019]            | 0.010<br>[0.004, 0.016]            | 0.025<br>[0.020, 0.029]            |
| Complete and partial dentures   | 0.127<br>[0.117, 0.138]            | 3.754<br>[3.650, 3.858]            | 0.552<br>[0.516, 0.588]            | 0.248<br>[0.232, 0.264]            | 0.199<br>[0.172, 0.225]            | 0.155<br>[0.142, 0.168]            |
| Orthodontic                     | 0.033<br>[0.027, 0.039]            | 0.005<br>[0.000, 0.009]            | 0.099<br>[0.083, 0.115]            | 2.302<br>[2.249, 2.357]            | 0.003<br>[0.001, 0.005]            | 0.059<br>[0.049, 0.070]            |

|                                 |                         |                         |                         |                         |                         |                         |
|---------------------------------|-------------------------|-------------------------|-------------------------|-------------------------|-------------------------|-------------------------|
| <b>Referral</b>                 |                         |                         |                         |                         |                         |                         |
| Self-referral                   | 1.373<br>[1.344, 1.401] | 2.429<br>[2.355, 2.504] | 2.576<br>[2.507, 2.646] | 1.550<br>[1.513, 1.587] | 1.276<br>[1.220, 1.332] | 1.660<br>[1.623, 1.696] |
| Referred by others <sup>†</sup> | 0.128<br>[0.118, 0.137] | 0.090<br>[0.075, 0.104] | 0.063<br>[0.051, 0.074] | 0.088<br>[0.079, 0.098] | 0.206<br>[0.183, 0.229] | 0.055<br>[0.048, 0.062] |
| <b>Location of clinic</b>       |                         |                         |                         |                         |                         |                         |
| Within SA2 of residence         | 0.007<br>[0.002, 0.015] | 0.662<br>[0.618, 0.707] | 0.213<br>[0.182, 0.243] | 0.550<br>[0.525, 0.575] | 0.143<br>[0.119, 0.167] | 1.672<br>[1.636, 1.708] |
| Outside SA2 of residence        | 1.564<br>[1.535, 1.592] | 1.862<br>[1.795, 1.929] | 2.527<br>[2.458, 2.596] | 1.104<br>[1.072, 1.137] | 1.448<br>[1.385, 1.510] | 0.008<br>[0.004, 0.010] |
| <b>Urbanicity of clinic</b>     |                         |                         |                         |                         |                         |                         |
| Metropolitan                    | 1.596<br>[1.566, 1.626] | 2.467<br>[2.392, 2.542] | 2.880<br>[2.807, 2.953] | 1.449<br>[1.413, 1.485] | 1.264<br>[1.211, 1.317] | 1.449<br>[1.414, 1.483] |
| Regional and rural              | 0.006<br>[0.001, 0.012] | 0.196<br>[0.171, 0.221] | 0.020<br>[0.010, 0.029] | 0.261<br>[0.245, 0.278] | 0.344<br>[0.312, 0.377] | 0.312<br>[0.296, 0.329] |
| <b>Co-location of clinic</b>    |                         |                         |                         |                         |                         |                         |
| Co-located with RHP             | 0.527<br>[0.507, 0.547] | 1.238<br>[1.180, 1.296] | 0.754<br>[0.708, 0.799] | 0.662<br>[0.636, 0.687] | 0.843<br>[0.790, 0.897] | 0.925<br>[0.897, 0.952] |
| Not co-located with RHP         | 0.988<br>[0.963, 1.014] | 1.237<br>[1.179, 1.293] | 1.870<br>[1.807, 1.934] | 0.956<br>[0.926, 0.986] | 0.715<br>[0.670, 0.760] | 0.770<br>[0.745, 0.795] |

<sup>†</sup>Others include health care professionals, dental professionals, refugee or community support services, family violence or support services, housing or homelessness services, and educational institutions; Profile 1, 'General – Restorative'; Profile 2, 'Denture – Complete and partial dentures'; Profile 3, 'Emergency – Operative'; Profile 4, 'General – Orthodontic'; Profile 5, 'General – Preventive'; Profile 6, 'Emergency – Extractions'; SA2, statistical area level 2; RHP, refugee health program.

**Table S7.** Bivariate and multilevel multivariate analyses results

| Profiles of public dental service use<br>(Ref.: Profile 5) | Unadjusted model cCOR [95% CI] |                         |                          |                         |                         |                | Fully adjusted model aCOR [95% CI] |                         |                         |                         |                         |  |
|------------------------------------------------------------|--------------------------------|-------------------------|--------------------------|-------------------------|-------------------------|----------------|------------------------------------|-------------------------|-------------------------|-------------------------|-------------------------|--|
|                                                            | Profile 1                      | Profile 2               | Profile 3                | Profile 4               | Profile 6               | $\chi^2$ (df)  | Profile 1                          | Profile 2               | Profile 3               | Profile 4               | Profile 6               |  |
| <b>Individual-level variables</b>                          |                                |                         |                          |                         |                         |                |                                    |                         |                         |                         |                         |  |
| Age                                                        | 0.98***<br>[0.97, 0.98]        | 1.05***<br>[1.04, 1.05] | 0.99***<br>[0.99, 1.00]  | 0.85***<br>[0.84, 0.85] | 0.98***<br>[0.97, 0.98] | 9137.47 (5)*** | 0.97***<br>[0.97, 0.97]            | 1.04***<br>[1.04, 1.05] | 0.98***<br>[0.98, 0.98] | 0.83***<br>[0.83, 0.84] | 0.97***<br>[0.97, 0.98] |  |
| Sex                                                        | (Ref.: Male)                   |                         |                          |                         |                         |                | 14.15 (5)*                         |                         |                         |                         |                         |  |
| Female                                                     | 1.12*<br>[1.03, 1.23]          | 1.00<br>[0.88, 1.13]    | 1.01<br>[0.90, 1.14]     | 1.04<br>[0.94, 1.16]    | 1.11*<br>[1.01, 1.22]   |                | 1.26***<br>[1.14, 1.40]            | 1.02<br>[0.88, 1.17]    | 1.14*<br>[1.00, 1.30]   | 1.23**<br>[1.08, 1.39]  | 1.22***<br>[1.09, 1.36] |  |
| <b>Region of birth</b>                                     | (Ref.: East Asia & Pacific)    |                         |                          |                         |                         |                | 1692.30 (20)***                    |                         |                         |                         |                         |  |
| Europe, Central Asia,<br>Americas, and Caribbean           | 2.15*<br>[1.10, 4.20]          | 4.29***<br>[2.00, 9.18] | 5.79***<br>[2.66, 12.61] | 0.48<br>[0.20, 1.20]    | 1.98<br>[0.97, 4.05]    |                | 2.44*<br>[1.15, 5.21]              | 1.38<br>[0.59, 3.27]    | 4.01**<br>[1.69, 9.51]  | 0.84<br>[0.28, 2.55]    | 3.81**<br>[1.69, 8.57]  |  |
| Middle East & North Africa                                 | 2.55***<br>[2.26, 2.86]        | 2.43***<br>[2.06, 2.86] | 6.94***<br>[5.87, 8.21]  | 1.10<br>[0.88, 1.14]    | 2.41***<br>[2.13, 2.74] |                | 1.84***<br>[1.42, 2.38]            | 1.08<br>[0.78, 1.50]    | 3.66***<br>[2.68, 5.01] | 1.18<br>[0.87, 1.61]    | 2.26***<br>[1.71, 2.97] |  |
| South Asia                                                 | 1.57***<br>[1.35, 1.82]        | 2.23***<br>[1.83, 2.72] | 4.20***<br>[3.43, 5.14]  | 1.14<br>[0.97, 1.35]    | 3.06***<br>[2.62, 3.56] |                | 1.06<br>[0.82, 1.37]               | 1.19<br>[0.86, 1.65]    | 2.07***<br>[1.51, 2.84] | 0.99<br>[0.74, 1.32]    | 2.06***<br>[1.57, 2.69] |  |
| Sub-Saharan Africa                                         | 0.66***<br>[0.58, 0.74]        | 0.60***<br>[0.49, 0.73] | 1.10<br>[0.90, 1.36]     | 0.36***<br>[0.31, 0.42] | 1.04<br>[0.91, 1.19]    |                | 1.01<br>[0.82, 1.26]               | 0.56***<br>[0.42, 0.76] | 1.09<br>[0.81, 1.46]    | 0.68**<br>[0.52, 0.88]  | 1.52***<br>[1.20, 1.92] |  |
| <b>Preferred language</b>                                  | (Ref.: English)                |                         |                          |                         |                         |                | 1359.91 (25)***                    |                         |                         |                         |                         |  |
| Arabic                                                     | 2.12***<br>[1.83, 2.45]        | 3.01***<br>[2.44, 3.73] | 2.09***<br>[1.75, 2.49]  | 2.20***<br>[1.85, 2.62] | 2.01***<br>[1.72, 2.34] |                | 1.07<br>[0.86, 1.32]               | 1.11<br>[0.82, 1.49]    | 0.74*<br>[0.58, 0.95]   | 1.51**<br>[1.15, 1.99]  | 1.79***<br>[1.43, 2.25] |  |

|                                        |                         |                         |                         |                         |                         |                         |                         |                         |                         |                         |
|----------------------------------------|-------------------------|-------------------------|-------------------------|-------------------------|-------------------------|-------------------------|-------------------------|-------------------------|-------------------------|-------------------------|
| Persian and Dari                       | 2.37***<br>[1.94, 2.89] | 4.87***<br>[3.75, 6.31] | 3.09***<br>[2.46, 3.88] | 3.30***<br>[2.63, 4.14] | 2.81***<br>[2.29, 3.45] | 1.29*<br>[1.01, 1.66]   | 2.18***<br>[1.58, 3.01] | 1.32*<br>[1.00, 1.75]   | 1.50**<br>[1.11, 2.02]  | 1.42**<br>[1.09, 1.84]  |
| Karen                                  | 0.75**<br>[0.63, 0.89]  | 1.15<br>[0.88, 1.51]    | 0.17***<br>[0.12, 0.25] | 2.99***<br>[2.47, 3.62] | 1.05<br>[0.88, 1.26]    | 1.28<br>[0.95, 1.73]    | 0.73<br>[0.48, 1.09]    | 0.37***<br>[0.23, 0.58] | 1.67**<br>[1.19, 2.33]  | 1.68***<br>[1.24, 2.29] |
| Burmese and Related Languages          | 1.05<br>[0.88, 1.25]    | 1.25<br>[0.95, 1.64]    | 0.45***<br>[0.35, 0.59] | 1.85***<br>[1.51, 2.26] | 0.78**<br>[0.64, 0.94]  | 1.07<br>[0.83, 1.36]    | 0.87<br>[0.60, 1.25]    | 0.64*<br>[0.45, 0.92]   | 1.20<br>[0.88, 1.62]    | 1.62***<br>[1.23, 2.11] |
| Other Languages                        | 0.83**<br>[0.73, 0.95]  | 1.33**<br>[1.08, 1.63]  | 0.54***<br>[0.46, 0.65] | 1.20*<br>[1.02, 1.41]   | 0.85*<br>[0.74, 0.98]   | 1.05<br>[0.89, 1.25]    | 1.26<br>[0.98, 1.61]    | 0.74**<br>[0.59, 0.92]  | 1.04<br>[0.84, 1.29]    | 1.19<br>[0.99, 1.42]    |
| <b>Request for interpreter service</b> | (Ref.: Yes)             |                         |                         |                         |                         | 76.67 (5)***            |                         |                         |                         |                         |
| No                                     | 1.00<br>[0.91, 1.10]    | 0.65***<br>[0.57, 0.74] | 0.89<br>[0.79, 1.00]    | 0.99<br>[0.89, 1.10]    | 1.03<br>[0.93, 1.13]    | 1.03<br>[0.92, 1.16]    | 0.92<br>[0.78, 1.07]    | 0.83*<br>[0.71, 0.96]   | 1.16*<br>[1.01, 1.34]   | 1.23**<br>[1.09, 1.39]  |
| <b>Type of eligibility card</b>        | (Ref.: No card)         |                         |                         |                         |                         | 620.19 (10)***          |                         |                         |                         |                         |
| Health Care Card                       | 0.61***<br>[0.53, 0.69] | 1.27*<br>[1.02, 1.56]   | 0.76***<br>[0.64, 0.89] | 0.92<br>[0.80, 1.07]    | 0.77***<br>[0.67, 0.88] | 0.68***<br>[0.58, 0.79] | 1.52***<br>[1.21, 1.93] | 0.99<br>[0.82, 1.19]    | 1.55***<br>[1.30, 1.86] | 0.90<br>[0.77, 1.05]    |
| Pensioner Concession Card              | 0.46***<br>[0.39, 0.53] | 2.74***<br>[2.19, 3.43] | 0.75**<br>[0.62, 0.91]  | 0.63***<br>[0.53, 0.75] | 0.67***<br>[0.57, 0.79] | 0.89<br>[0.74, 1.08]    | 2.09***<br>[1.61, 2.71] | 1.44**<br>[1.15, 1.80]  | 2.61***<br>[2.09, 3.27] | 1.19<br>[0.99, 1.45]    |
| <b>Contextual-level variables</b>      | (Ref.: Metropolitan)    |                         |                         |                         |                         | 3220.30 (10)***         |                         |                         |                         |                         |
| <b>Urbanicity of residence</b>         | (Ref.: Metropolitan)    |                         |                         |                         |                         | 3220.30 (10)***         |                         |                         |                         |                         |
| Regional                               | 0.02***<br>[0.01, 0.03] | 0.19***<br>[0.15, 0.24] | 0.04***<br>[0.03, 0.06] | 0.58***<br>[0.50, 0.66] | 0.30***<br>[0.26, 0.35] | 0.08***<br>[0.05, 0.15] | 0.64<br>[0.35, 1.16]    | 0.19***<br>[0.10, 0.38] | 1.48<br>[0.84, 2.60]    | 0.42**<br>[0.24, 0.72]  |

|                                             |                                   |                         |                         |                         |                         |                |                         |                       |                         |                         |                         |
|---------------------------------------------|-----------------------------------|-------------------------|-------------------------|-------------------------|-------------------------|----------------|-------------------------|-----------------------|-------------------------|-------------------------|-------------------------|
| Rural                                       | 0.05***<br>[0.03, 0.09]           | 0.60*<br>[0.37, 0.95]   | 0.08***<br>[0.03, 0.19] | 0.42***<br>[0.27, 0.63] | 2.86***<br>[1.90, 4.13] |                | 0.02***<br>[0.01, 0.06] | 0.34*<br>[0.15, 0.78] | 0.05***<br>[0.02, 0.15] | 0.15***<br>[0.07, 0.34] | 1.52*<br>[1.21, 3.24]   |
| <b>Socioeconomic disadvantage (tertile)</b> | (Ref.: 1st - least disadvantaged) |                         |                         |                         |                         | 630.93 (10)*** |                         |                       |                         |                         |                         |
| 2nd                                         | 0.70*<br>[0.53, 0.93]             | 0.58**<br>[0.41, 0.83]  | 0.59**<br>[0.43, 0.82]  | 0.68*<br>[0.49, 0.94]   | 2.27***<br>[1.52, 3.38] |                | 0.73<br>[0.45, 1.20]    | 0.70<br>[0.40, 1.21]  | 0.70<br>[0.42, 1.18]    | 0.53*<br>[0.31, 0.92]   | 2.12**<br>[1.20, 3.75]  |
| 3rd                                         | 0.67**<br>[0.51, 0.87]            | 0.59**<br>[0.42, 0.82]  | 0.50**<br>[0.36, 0.68]  | 0.97<br>[0.72, 1.33]    | 4.61***<br>[3.12, 6.79] |                | 0.69<br>[0.42, 1.13]    | 0.65<br>[0.37, 1.13]  | 0.62<br>[0.36, 1.04]    | 0.61<br>[0.35, 1.04]    | 2.72***<br>[1.54, 4.81] |
| <b>Refugee health program in CHC</b>        | (Ref.: No)                        |                         |                         |                         |                         | 514.76 (5)***  |                         |                       |                         |                         |                         |
| Yes                                         | 0.96<br>[0.85, 1.07]              | 1.09<br>[0.93, 1.27]    | 0.84*<br>[0.73, 0.97]   | 1.65***<br>[1.44, 1.89] | 2.46***<br>[2.16, 2.81] |                | 0.68*<br>[0.51, 0.92]   | 0.96<br>[0.69, 1.33]  | 0.65**<br>[0.48, 0.89]  | 0.97<br>[0.71, 1.34]    | 1.99***<br>[1.46, 2.70] |
| <b>Driving SPAI scores</b>                  | 0.01***<br>[0.01, 0.02]           | 0.24***<br>[0.15, 0.40] | 0.03***<br>[0.02, 0.05] | 1.83***<br>[1.30, 2.58] | 1.72**<br>[1.24, 2.38]  | 1594.06 (5)*** | 0.07***<br>[0.03, 0.15] | 0.37*<br>[0.15, 0.88] | 0.12***<br>[0.05, 0.30] | 1.60<br>[0.75, 3.38]    | 1.57***<br>[1.15, 3.27] |
| <b>Public transit SPAI scores</b>           | 0.07***<br>[0.06, 0.09]           | 0.40***<br>[0.31, 0.52] | 0.12***<br>[0.09, 0.17] | 1.03<br>[0.91, 1.18]    | 1.25***<br>[1.11, 1.41] | 1773.47 (5)*** | 0.28***<br>[0.16, 0.47] | 0.83<br>[0.47, 1.48]  | 0.45**<br>[0.25, 0.80]  | 1.17<br>[0.70, 1.95]    | 1.48***<br>[1.20, 3.11] |

\*\*\*p<.001, \*\* p<.01, \* p<.05; Profile 1, 'General – Restorative'; Profile 2, Denture – 'Complete and partial dentures'; Profile 3, 'Emergency – Operative'; Profile 4, 'General – Orthodontic'; Profile 5, 'General – Preventive'; Profile 6, 'Emergency – Extractions'; cCOR, crude conditional odds ratio; aCOR, adjusted conditional odds ratio; CI, confidence interval;  $\chi^2$ , Chi-squared test; df, degrees of freedom; CHC, community health centre; SPAI, spatial accessibility index
